# Supplementary material for: Identifying critical genes associated with aneurysmal subarachnoid hemorrhage by weighted gene co-expression network analysis
Source: publisher site journal article supplement (doi:10.18632/aging.203542), 2021-09-20
Supplement: Supplementary file [file aging-v13i18-203542-supplementary-material-SD1.pdf]

## SUPPLEMENTARY TABLE

**Supplementary Table 1. The average qRT-PCR values.**

| <b>Genes</b> | <b>Control</b> | <b>aSAH (1 day)</b> | <b>3 days</b> | <b>7 days</b> |
|--------------|----------------|---------------------|---------------|---------------|
| ALPL         | 30.55±1.46     | 32.42±1.49          | 29.77±1.42    | 27.96±2.02    |
| PGLYRP1      | 30.35±0.89     | 31.57±1.37          | 30.91±0.98    | 30.64±1.04    |
| ACSL1        | 21.01±1.30     | 22.76±0.90          | 22.27±1.01    | 21.92±1.28    |
| CD27         | 32.03±0.97     | 29.86±1.37          | 30.20±1.33    | 29.58±1.31    |
| TPST1        | 28.12±2.30     | 30.83±1.70          | 29.23±2.26    | 29.46±2.17    |
| ANXA3        | 31.08±1.09     | 32.52±1.23          | 31.17±1.47    | 29.08±1.08    |
| ARG1         | 30.14±1.81     | 32.40±1.27          | 30.59±1.39    | 28.80±1.56    |
